# Supplementary material
Source: PubMed Central journal article supplement (PMC5941947)
Supplement: NIHMS959990-supplement-Supplement1.pdf [file NIHMS959990-supplement-Supplement1.pdf]

## **Appendix A. Supplementary data**

### **Vegetated land cover near residence is associated with reduced allostatic load and improved biomarkers of neuroendocrine, metabolic and immune functions**

Andrey I. Egorov,<sup>1</sup> Shannon M. Griffin,<sup>2</sup> Reagan R. Converse,<sup>1</sup> Jennifer N. Styles,<sup>1,3</sup>

Elizabeth A. Sams,<sup>1</sup> Anthony Wilson,<sup>4</sup> Laura E. Jackson,<sup>1</sup> and Timothy J. Wade<sup>1</sup>

<sup>1</sup> National Health and Environmental Effects Research Laboratory, United States Environmental Protection Agency, Research Triangle Park, NC, USA.

<sup>2</sup> National Exposure Research Laboratory, United States Environmental Protection Agency, Cincinnati, OH, USA.

<sup>3</sup> Department of Environmental Sciences and Engineering, University of North Carolina at Chapel Hill, Chapel Hill, NC, USA.

<sup>4</sup> Association of Schools and Programs of Public Health fellow at the United States Environmental Protection Agency, Research Triangle Park, NC, USA.

## Supplementary table of contents

|                                                                                                                                                                                                                                                                                                                                                                                                                                                                    |   |
|--------------------------------------------------------------------------------------------------------------------------------------------------------------------------------------------------------------------------------------------------------------------------------------------------------------------------------------------------------------------------------------------------------------------------------------------------------------------|---|
| Supplementary Table 1. Estimated effects with 95% confidence limits of residential vegetated land cover on biomarkers and allostatic load by land cover weighting scheme: adjusted ORs of potentially unhealthy biomarker values (biomarkers dichotomized at 25th or 75th percentile) and adjusted multiplicative changes in mean allostatic load per IQR increases in residential vegetated land cover.....                                                       | 3 |
| Supplementary Table 2. Associations between vegetated land cover (land cover weighting scheme 5, exponential decay with $\lambda = .0025$ ) and allostatic load (AL2) measure based on 15 biomarkers dichotomized at 10 <sup>th</sup> or 90 <sup>th</sup> percentile: results of stratified analyses and analyses of interaction effects.....                                                                                                                      | 8 |
| Supplementary Figure 1. Adjusted ORs of potentially unhealthy biomarker values with 95% confidence limits per IQR increase in residential vegetated land cover (weighting scheme 5 based on exponential decay with $\lambda = 0.0025$ ), plotted on a logarithmic scale; biomarkers are dichotomized at 25 <sup>th</sup> percentile (< 25 pctl) or 75 <sup>th</sup> percentile (> 75 pctl) of their distributions and sorted in the same order as in Figure 1..... | 9 |

Supplementary Table 1. Estimated effects with 95% confidence limits of residential vegetated land cover on biomarkers and allostatic load by land cover weighting scheme: adjusted ORs of potentially unhealthy biomarker values (biomarkers dichotomized at 25<sup>th</sup> or 75<sup>th</sup> percentile) and adjusted multiplicative changes in mean allostatic load per IQR increases in residential vegetated land cover.

|                                    | <b>Scheme 1:</b>      | <b>Scheme 2:</b>         | <b>Scheme 3:</b>         | <b>Scheme 4:</b>         | <b>Scheme 5:</b>         | <b>Scheme 6: Equal</b>  | <b>Scheme 7:</b>      |
|------------------------------------|-----------------------|--------------------------|--------------------------|--------------------------|--------------------------|-------------------------|-----------------------|
|                                    | <b>Average within</b> | <b>Exponential</b>       | <b>Exponential</b>       | <b>Exponential</b>       | <b>Exponential</b>       | <b>weights for 50 m</b> | <b>Average within</b> |
| <b>Outcome (set of covariates)</b> | <b>50 m radius</b>    | <b>decay,</b>            | <b>decay,</b>            | <b>decay,</b>            | <b>decay,</b>            | <b>annuli within</b>    | <b>500 m radius</b>   |
|                                    |                       | <b>distribution with</b> | <b>distribution with</b> | <b>distribution with</b> | <b>distribution with</b> | <b>500 m</b>            |                       |
|                                    |                       | <b>λ = 0.02</b>          | <b>λ = 0.01</b>          | <b>λ = 0.005</b>         | <b>λ = 0.0025</b>        |                         |                       |
| <b>Biomarker <sup>a</sup></b>      |                       |                          |                          |                          |                          |                         |                       |
| α-amylase > 75 pctl (1)            | 0.80 (0.46, 1.41)     | 0.75 (0.43, 1.28)        | 0.68 (0.38, 1.22)        | 0.64 (0.35, 1.19)        | 0.64 (0.34, 1.19)        | 0.65 (0.35, 1.20)       | 0.70 (0.40, 1.23)     |
| CRP > 75 pctl (2)                  | 0.60 (0.35, 1.01)     | 0.61 (0.37, 1.01)        | 0.62 (0.35, 1.08)        | 0.65 (0.36, 1.18)        | 0.69 (0.38, 1.25)        | 0.73 (0.40, 1.33)       | 0.82 (0.47, 1.44)     |
| DHEA < 25 pctl (2)                 | 0.72 (0.46, 1.12)     | 0.67 (0.44, 1.02)        | 0.61 (0.39, 0.96)*       | 0.58 (0.36, 0.93)*       | 0.57 (0.36, 0.92)*       | 0.58 (0.36, 0.93)*      | 0.62 (0.40, 0.96)*    |
| Dopamine < 25 pctl (3)             | 0.69 (0.45, 1.07)     | 0.67 (0.45, 1.02)        | 0.63 (0.40, 0.98)*       | 0.61 (0.38, 0.98)*       | 0.62 (0.39, 1.00)*       | 0.66 (0.41, 1.04)       | 0.76 (0.50, 1.16)     |
| Epinephrine <25 pctl (2)           | 1.20 (0.77, 1.85)     | 1.09 (0.73, 1.65)        | 1.04 (0.67, 1.61)        | 0.99 (0.63, 1.57)        | 0.96 (0.61, 1.53)        | 0.94 (0.59, 1.49)       | 0.92 (0.60, 1.40)     |

|                                    | <b>Scheme 1:</b>      | <b>Scheme 2:</b>                   | <b>Scheme 3:</b>                   | <b>Scheme 4:</b>                    | <b>Scheme 5:</b>                     | <b>Scheme 6: Equal</b>  | <b>Scheme 7:</b>      |
|------------------------------------|-----------------------|------------------------------------|------------------------------------|-------------------------------------|--------------------------------------|-------------------------|-----------------------|
| <b>Outcome (set of covariates)</b> | <b>Average within</b> | <b>Exponential</b>                 | <b>Exponential</b>                 | <b>Exponential</b>                  | <b>Exponential</b>                   | <b>weights for 50 m</b> | <b>Average within</b> |
|                                    | <b>50 m radius</b>    | <b>decay,</b>                      | <b>decay,</b>                      | <b>decay,</b>                       | <b>decay,</b>                        | <b>annuli within</b>    | <b>500 m radius</b>   |
|                                    |                       | <b>distribution with</b>           | <b>distribution with</b>           | <b>distribution with</b>            | <b>distribution with</b>             | <b>500 m</b>            |                       |
|                                    |                       | <b><math>\lambda = 0.02</math></b> | <b><math>\lambda = 0.01</math></b> | <b><math>\lambda = 0.005</math></b> | <b><math>\lambda = 0.0025</math></b> |                         |                       |
| Epinephrine >75 pctl (2)           | 0.58 (0.37, 0.93)*    | 0.57 (0.36, 0.88)*                 | 0.55 (0.34, 0.88)*                 | 0.57 (0.35, 0.94)*                  | 0.61 (0.37, 0.99)*                   | 0.66 (0.41, 1.07)       | 0.79 (0.51, 1.22)     |
| Fibrinogen > 75 pctl (2)           | 0.77 (0.50, 1.20)     | 0.70 (0.46, 1.07)                  | 0.64 (0.40, 1.01)                  | 0.60 (0.37, 0.98)*                  | 0.60 (0.37, 0.97)*                   | 0.61 (0.38, 0.97)*      | 0.66 (0.43, 1.01)     |
| HDL < 25 pctl (4)                  | 0.53 (0.30, 0.95)*    | 0.50 (0.29, 0.87)*                 | 0.45 (0.25, 0.81)*                 | 0.43 (0.23, 0.81)*                  | 0.45 (0.24, 0.84)*                   | 0.48 (0.26, 0.90)*      | 0.60 (0.34, 1.05)     |
| ICAM-1 > 75 pctl (2)               | 1.03 (0.66, 1.62)     | 1.06 (0.69, 1.63)                  | 1.04 (0.65, 1.67)                  | 1.01 (0.62, 1.65)                   | 0.99 (0.60, 1.62)                    | 0.97 (0.60, 1.59)       | 0.96 (0.61, 1.50)     |
| IL-1beta > 75 pctl (1)             | 1.19 (0.77, 1.83)     | 1.10 (0.73, 1.65)                  | 1.07 (0.69, 1.66)                  | 1.02 (0.65, 1.62)                   | 0.97 (0.61, 1.54)                    | 0.87 (0.56, 1.33)       | 0.81 (0.54, 1.20)     |
| IL-6 > 75 pctl (4)                 | 0.92 (0.58, 1.45)     | 0.93 (0.60, 1.44)                  | 0.94 (0.59, 1.51)                  | 0.95 (0.58, 1.55)                   | 0.95 (0.58, 1.55)                    | 0.94 (0.58, 1.52)       | 0.92 (0.59, 1.43)     |
| IL-8 > 75 pctl (5)                 | 0.92 (0.60, 1.41)     | 0.87 (0.59, 1.30)                  | 0.80 (0.52, 1.23)                  | 0.73 (0.46, 1.15)                   | 0.70 (0.44, 1.10)                    | 0.67 (0.43, 1.06)       | 0.67 (0.44, 1.01)     |
| LDL > 75 pctl (4)                  | 1.42 (0.86, 2.36)     | 1.43 (0.88, 2.34)                  | 1.53 (0.90, 2.61)                  | 1.58 (0.91, 2.74)                   | 1.56 (0.90, 2.70)                    | 1.51 (0.88, 2.58)       | 1.35 (0.83, 2.21)     |

|                                    | <b>Scheme 1:</b>      | <b>Scheme 2:</b>                   | <b>Scheme 3:</b>                   | <b>Scheme 4:</b>                    | <b>Scheme 5:</b>                     | <b>Scheme 6: Equal</b>  | <b>Scheme 7:</b>      |
|------------------------------------|-----------------------|------------------------------------|------------------------------------|-------------------------------------|--------------------------------------|-------------------------|-----------------------|
| <b>Outcome (set of covariates)</b> | <b>Average within</b> | <b>Exponential</b>                 | <b>Exponential</b>                 | <b>Exponential</b>                  | <b>Exponential</b>                   | <b>weights for 50 m</b> | <b>Average within</b> |
|                                    | <b>50 m radius</b>    | <b>decay,</b>                      | <b>decay,</b>                      | <b>decay,</b>                       | <b>decay,</b>                        | <b>annuli within</b>    | <b>500 m radius</b>   |
|                                    |                       | <b>distribution with</b>           | <b>distribution with</b>           | <b>distribution with</b>            | <b>distribution with</b>             | <b>500 m</b>            |                       |
|                                    |                       | <b><math>\lambda = 0.02</math></b> | <b><math>\lambda = 0.01</math></b> | <b><math>\lambda = 0.005</math></b> | <b><math>\lambda = 0.0025</math></b> |                         |                       |
| MPO > 80 pctl (6)                  | 0.83 (0.55, 1.26)     | 0.79 (0.54, 1.17)                  | 0.75 (0.49, 1.15)                  | 0.74 (0.47, 1.15)                   | 0.74 (0.48, 1.15)                    | 0.75 (0.49, 1.17)       | 0.80 (0.53, 1.20)     |
| Norepinephrine < 25 pctl (7)       | 0.55 (0.34, 0.88)*    | 0.58 (0.37, 0.89)*                 | 0.54 (0.34, 0.88)*                 | 0.51 (0.31, 0.84)*                  | 0.48 (0.29, 0.80)*                   | 0.46 (0.27, 0.77)*      | 0.50 (0.31, 0.80)*    |
| Norepinephrine > 75 pctl (7)       | 1.02 (0.65, 1.60)     | 1.03 (0.67, 1.60)                  | 0.99 (0.62, 1.58)                  | 0.93 (0.57, 1.52)                   | 0.89 (0.55, 1.45)                    | 0.86 (0.53, 1.39)       | 0.83 (0.54, 1.29)     |
| SAA > 75 pctl (2)                  | 0.92 (0.57, 1.48)     | 0.92 (0.58, 1.44)                  | 0.92 (0.56, 1.50)                  | 0.96 (0.57, 1.61)                   | 1.01 (0.60, 1.70)                    | 1.08 (0.64, 1.82)       | 1.21 (0.74, 1.97)     |
| TNF-a > 75 pctl (8)                | 1.05 (0.68, 1.63)     | 1.05 (0.70, 1.59)                  | 1.06 (0.68, 1.66)                  | 1.07 (0.67, 1.71)                   | 1.08 (0.67, 1.72)                    | 1.07 (0.68, 1.71)       | 1.06 (0.69, 1.64)     |
| Uric acid > 75 pctl (2)            | 0.86 (0.53, 1.40)     | 0.95 (0.60, 1.52)                  | 1.04 (0.63, 1.72)                  | 1.10 (0.65, 1.88)                   | 1.12 (0.66, 1.90)                    | 1.11 (0.66, 1.87)       | 1.06 (0.66, 1.70)     |
| VCAM-1 > 75 pctl (2)               | 0.86 (0.56, 1.33)     | 0.85 (0.57, 1.28)                  | 0.80 (0.51, 1.24)                  | 0.73 (0.46, 1.16)                   | 0.69 (0.44, 1.10)                    | 0.66 (0.42, 1.04)       | 0.64 (0.42, 0.97)*    |

|                                    | <b>Scheme 1:</b>      | <b>Scheme 2:</b>                   | <b>Scheme 3:</b>                   | <b>Scheme 4:</b>                    | <b>Scheme 5:</b>                     | <b>Scheme 6: Equal</b>  | <b>Scheme 7:</b>      |
|------------------------------------|-----------------------|------------------------------------|------------------------------------|-------------------------------------|--------------------------------------|-------------------------|-----------------------|
|                                    | <b>Average within</b> | <b>Exponential</b>                 | <b>Exponential</b>                 | <b>Exponential</b>                  | <b>Exponential</b>                   | <b>weights for 50 m</b> | <b>Average within</b> |
| <b>Outcome (set of covariates)</b> | <b>50 m radius</b>    | <b>decay,</b>                      | <b>decay,</b>                      | <b>decay,</b>                       | <b>decay,</b>                        | <b>annuli within</b>    | <b>500 m radius</b>   |
|                                    |                       | <b>distribution with</b>           | <b>distribution with</b>           | <b>distribution with</b>            | <b>distribution with</b>             | <b>500 m</b>            |                       |
|                                    |                       | <b><math>\lambda = 0.02</math></b> | <b><math>\lambda = 0.01</math></b> | <b><math>\lambda = 0.005</math></b> | <b><math>\lambda = 0.0025</math></b> |                         |                       |

---

**Allostatic load <sup>b</sup>**

|                         |                    |                    |                    |                    |                    |                    |                    |
|-------------------------|--------------------|--------------------|--------------------|--------------------|--------------------|--------------------|--------------------|
| AL 3: 18 biomarkers (2) | 0.87 (0.76, 0.99)* | 0.85 (0.74, 0.96)* | 0.82 (0.71, 0.94)* | 0.80 (0.69, 0.93)* | 0.79 (0.68, 0.92)* | 0.79 (0.68, 0.92)* | 0.81 (0.71, 0.92)* |
| AL 4: 15 biomarkers (2) | 0.88 (0.80, 0.96)* | 0.87 (0.80, 0.95)* | 0.85 (0.78, 0.93)* | 0.84 (0.76, 0.92)* | 0.84 (0.76, 0.92)* | 0.84 (0.77, 0.93)* | 0.87 (0.80, 0.95)* |

<sup>a</sup> Biomarkers dichotomized at 25<sup>th</sup> percentile (< 25 pctl) or 75<sup>th</sup> percentile (> 75 pctl)

<sup>b</sup> Allostatic load (AL) indices based on biomarkers dichotomized at 25<sup>th</sup> or 75<sup>th</sup> percentile

\* 0.0001 =< p < 0.05

\*\* p < 0.0001

Covariate sets:

1. Age, gender, housing density, spline of geographic coordinates
2. Age, gender, race, education, BMI, housing density, spline of geographic coordinates
3. Age, gender, race, education, housing density, spline of geographic coordinates
4. Age (categorical), gender, education, BMI, housing density, spline of geographic coordinates
5. Age, education, BMI, housing density, spline of geographic coordinates
6. Age, race, housing density, spline of geographic coordinates
7. Age, race, education, BMI, housing density, spline of geographic coordinates
8. Age, gender, education, BMI, housing density, spline of geographic coordinates.

Supplementary Table 2. Associations between vegetated land cover (land cover weighting scheme 5, exponential decay with  $\lambda = 0.0025$ ) and allostatic load (AL2) index based on 15 biomarkers dichotomized at 10<sup>th</sup> or 90<sup>th</sup> percentile: results of stratified analyses and analyses of interaction effects.

| <b>Stratification factor</b> | <b>Stratum</b>                 | <b>Adjusted<br/>multiplicative<br/>change in mean AL<br/>(95% CIs) per IQR<br/>increase in<br/>vegetated land<br/>cover</b> | <b>P-value for<br/>interaction<br/>effect</b> |
|------------------------------|--------------------------------|-----------------------------------------------------------------------------------------------------------------------------|-----------------------------------------------|
| Place of residence           | Durham, NC                     | 0.61 (0.47, 0.79)*                                                                                                          | 0.55                                          |
|                              | Other cities and towns         | 0.63 (0.52, 0.77)**                                                                                                         |                                               |
| Gender                       | Male                           | 0.56 (0.41, 0.76)*                                                                                                          | 0.31                                          |
|                              | Female                         | 0.66 (0.55, 0.79)**                                                                                                         |                                               |
| Education                    | Bachelor's degree or<br>higher | 0.60 (0.49, 0.73)**                                                                                                         | 0.30                                          |
|                              | Less than bachelor's<br>degree | 0.72 (0.56, 0.92)*                                                                                                          |                                               |
|                              |                                |                                                                                                                             |                                               |
| Race and ethnicity           | Non-Hispanic white             | 0.58 (0.48, 0.70)**                                                                                                         | 0.15                                          |
|                              | Other groups                   | 0.75 (0.58, 0.97)*                                                                                                          |                                               |
| Obesity                      | Obese                          | 0.43 (0.33, 0.57)**                                                                                                         | 0.06                                          |
|                              | Not obese                      | 0.71 (0.59, 0.86)*                                                                                                          |                                               |

\*  $0.0001 \leq p < 0.05$

\*\*  $p < 0.0001$



Supplementary Figure 1.

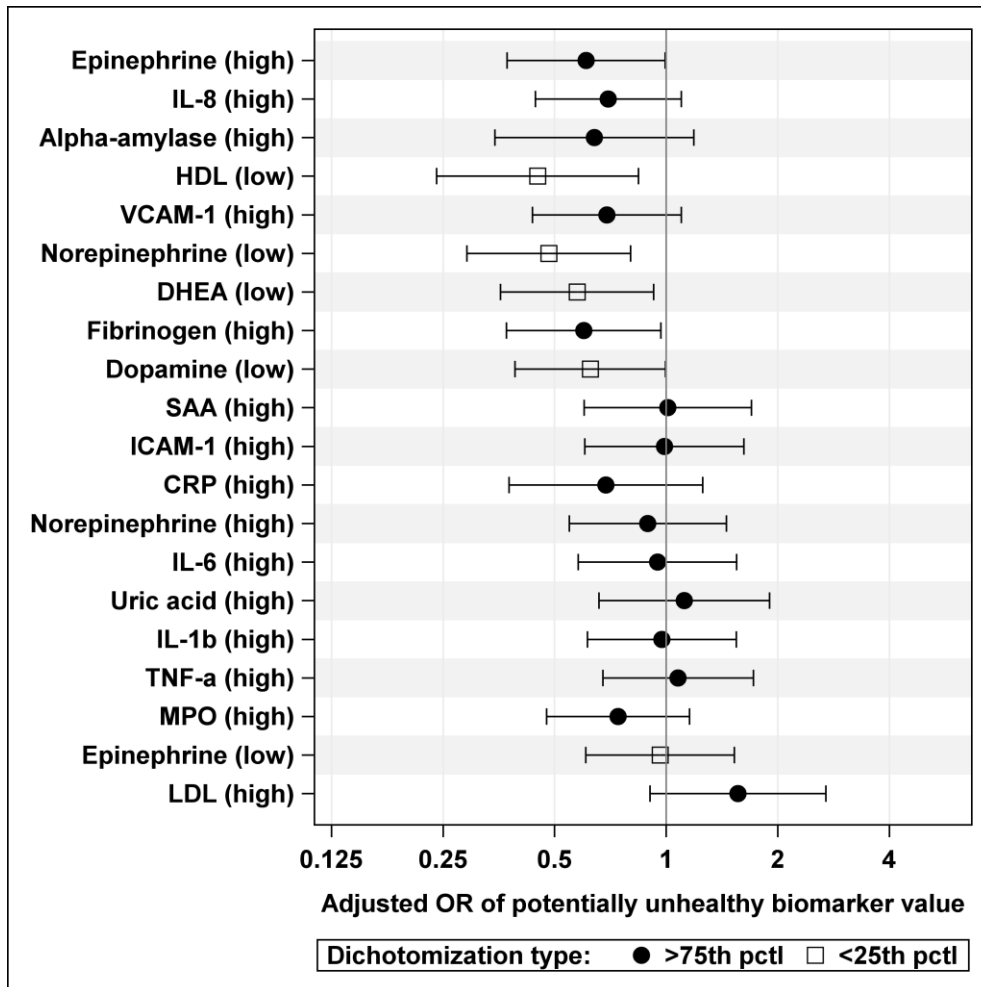

Supplementary Figure 1. Adjusted ORs of potentially unhealthy biomarker values with 95% confidence limits per IQR increase in residential vegetated land cover (weighting scheme 5 based on exponential decay with  $\lambda = 0.0025$ ), plotted on a logarithmic scale; biomarkers are dichotomized at 25<sup>th</sup> percentile (< 25 pctl) or 75<sup>th</sup> percentile (> 75 pctl) of their distributions and sorted in the same order as in Figure 1.
